# Supplementary material for: Challenges for FAIR-compliant description and comparison of crop phenotype data with standardized controlled vocabularies
Source: Database (Oxford). 2021 May 15;2021:baab028. doi: 10.1093/database/baab028 (PMC8122365; doi:10.1093/database/baab028)
Supplement: baab028_Supp [file baab028_supp.zip]

Archive with 7 entries (7 files):
- SupplementalTable6.pdf
- SupplementalTable7.pdf
- SupplementalTable1.pdf
- SupplementalTable2.pdf
- SupplementalTable3.pdf
- SupplementalTable4.pdf
- SupplementalTable5.pdf
