# Supplementary material for: Challenges for FAIR-compliant description and comparison of crop phenotype data with standardized controlled vocabularies
Source: Oxford University Press journal article supplement (doi:10.1093/database/baab028), 2021-01-01
Supplement: baab028_supp.zip [file baab028_supp.zip]

Supplemental Table S7. Indicative mapping of FAIR principles (<https://www.go-fair.org/fair-principles/>) to the MIAPPE, Trait dictionary (TD), and CropStoreDB. Boxes marked as checked are the principles that are covered by the TD or MIAPPE.

| <b>Findable</b>                                                                                                | <b>CropStoreDB</b> | <b>MIAPPE</b> | <b>Trait<br/>Dictionary</b> |
|----------------------------------------------------------------------------------------------------------------|--------------------|---------------|-----------------------------|
| F1. (meta)data are assigned a globally unique and persistent identifier                                        | ✓                  | ✓             | ✓                           |
| F2. data are described with rich metadata                                                                      | ✓                  | ✓             | ✓                           |
| F3. metadata clearly and explicitly include the identifier of the data it describes                            | ✓                  | ✓             | ✓                           |
| F4. (meta)data are registered or indexed in a searchable resource                                              | ✓                  | ✓             | ✓                           |
| <b>Accessible</b>                                                                                              |                    |               |                             |
| A1. (meta)data are retrievable by their identifier using a standardized communications protocol                | ✓                  | ✓             | ✓                           |
| A1.1 the protocol is open, free, and universally implementable                                                 | ✓                  | ✓             | ✓                           |
| A1.2 the protocol allows for an authentication and authorization procedure, where necessary                    | ✓                  | ✓             | ✓                           |
| A2. metadata are accessible, even when the data are no longer available                                        | ✓                  | ✓             | ✓                           |
| <b>Interoperable</b>                                                                                           |                    |               |                             |
| I1. (meta)data use a formal, accessible, shared, and broadly applicable language for knowledge representation. | ✓                  | ✓             | ✓                           |
| I2. (meta)data use vocabularies that follow FAIR principles                                                    | ✓                  | ✓             | ✓                           |
| I3. (meta)data include qualified references to other (meta)data                                                | ✓                  | ✓             | ✓                           |
| <b>Reusable</b>                                                                                                |                    |               |                             |

|                                                                                          |   |   |   |
|------------------------------------------------------------------------------------------|---|---|---|
| R1. meta(data) are richly described with a plurality of accurate and relevant attributes | ✓ | ✓ | ✓ |
| R1.1. (meta)data are released with a clear and accessible data usage license             | ✓ | ✓ | ✓ |
| R1.2. (meta)data are associated with detailed provenance                                 | ✓ | ✓ | ✓ |
| R1.3. (meta)data meet domain-relevant community standards                                | ✓ | ✓ |   |
