# Supplementary material for: Challenges for FAIR-compliant description and comparison of crop phenotype data with standardized controlled vocabularies
Source: Oxford University Press journal article supplement (doi:10.1093/database/baab028), 2021-01-01
Supplement: baab028_supp.zip [file baab028_supp.zip]

Supplemental Table 6. Example of semantic equivalent phenotypic traits across the data sources from the four institutes Integrated Breeding Platform (IBP), International Institute of Tropical Agriculture (IITA), Plant Genetic Resources Institute (IPGRI), University of Nottingham (UoN).

| <b>IBP</b>                   | <b>IITA</b>             | <b>IPGRI</b>                                | <b>UoN</b>            |
|------------------------------|-------------------------|---------------------------------------------|-----------------------|
| Leaf number per plant        | No of leaves per plant  | Number of leaves                            | Leaf number           |
| Pod number per plant         | Pods per plant          | N/A                                         | Pods per plant        |
| Seed number per pod          | Seeds per pod           | N/A                                         |                       |
| Hundred seed adjusted weight | 100 Seed weight         | 100-seed weight                             | N/A                   |
| Node number per stem         | No of nodes per stem    | Number of nodes per stem                    | N/A                   |
| Maturity time                | Days to Maturity        | Number of days from planting to maturity    | Days to Maturity      |
| Branch number per stem       | No of branches per stem | Number of branches per stem                 | N/A                   |
| Terminal leaflet colour      | Terminal Leaflet Colour | Colour of fully expanded terminal leaflet   | N/A                   |
| Pod colour                   | Pod color               | Pod colour                                  | N/A                   |
| N/A                          | Days to 50% flowering   | Number of days from sowing to 50% flowering | Days to 50% Flowering |
