# Supplementary material for: Challenges for FAIR-compliant description and comparison of crop phenotype data with standardized controlled vocabularies
Source: Oxford University Press journal article supplement (doi:10.1093/database/baab028), 2021-01-01
Supplement: baab028_supp.zip [file baab028_supp.zip]

| Name of Trait                      | Banana | Barley | Bracharia | Brassica | Cassava | Corn | Chickpea | Common bean | Cotton | Cowpea | Faba bean | Groundnut | Lentil | Maize | Mungbean | Oat | Pearl millet | Pigeonpea | Potato | Rice | Sorghum | Soybean | Sugar beet | Sugar Kelp | Sweetpotato | Vitis | Wheat | Yam | Grand Total |
|------------------------------------|--------|--------|-----------|----------|---------|------|----------|-------------|--------|--------|-----------|-----------|--------|-------|----------|-----|--------------|-----------|--------|------|---------|---------|------------|------------|-------------|-------|-------|-----|-------------|
| Plant height                       | 1      | 1      | 1         |          | 1       | 1    | 1        | 1           | 1      | 1      | 1         | 1         | 1      | 1     | 1        | 1   | 1            | 1         | 1      | 1    | 1       | 1       |            |            | 1           | 1     | 1     | 20  |             |
| Harvest index                      |        | 1      |           |          |         |      | 1        | 1           |        | 1      |           | 1         |        | 1     |          |     |              | 1         |        | 1    |         |         |            |            | 1           | 1     | 9     |     |             |
| Drought Tolerance                  |        |        | 1         |          |         |      | 1        | 1           |        | 1      |           |           | 1      |       | 1        |     |              |           |        |      |         | 1       |            |            |             | 1     | 1     | 10  |             |
| Seed weight                        |        |        |           | 1        |         |      |          | 1           |        | 1      |           | 1         | 1      | 1     | 1        |     |              | 1         |        |      |         | 1       |            |            |             | 1     | 9     |     |             |
| Flowering time                     |        | 1      |           |          |         | 1    | 1        |             |        | 1      | 1         | 1         | 1      |       | 1        |     |              | 1         |        |      | 1       | 1       |            |            |             | 1     | 8     |     |             |
| Growth habit                       |        | 1      |           |          |         |      | 1        | 1           |        | 1      | 1         | 1         | 1      | 1     | 1        |     |              |           |        |      | 1       |         |            |            |             |       | 8     |     |             |
| Leaf chlorophyll content           |        |        |           |          |         |      | 1        |             | 1      | 1      | 1         | 1         |        | 1     | 1        |     |              | 1         |        |      |         | 1       |            |            |             | 1     | 8     |     |             |
| Maturity time                      |        | 1      |           |          |         | 1    |          |             |        | 1      |           |           |        | 1     | 1        |     |              | 1         |        |      | 1       | 1       |            |            |             | 1     | 8     |     |             |
| Salinity tolerance                 |        | 1      |           |          |         |      | 1        |             |        | 1      | 1         | 1         | 1      | 1     | 1        |     |              |           |        | 1    |         | 1       |            |            |             | 1     | 8     |     |             |
| Seed shape                         |        |        |           |          |         | 1    | 1        |             | 1      | 1      | 1         | 1         | 1      |       | 1        |     |              |           |        | 1    |         |         |            |            |             |       | 8     |     |             |
| Grain protein content              |        | 1      |           |          |         |      |          |             |        | 1      |           |           | 1      | 1     | 1        |     | 1            |           |        |      |         | 1       |            |            |             | 1     | 7     |     |             |
| Plant stand                        |        | 1      |           | 1        |         |      |          |             |        |        |           |           |        | 1     | 1        |     |              | 1         |        |      |         |         |            |            |             | 1     | 7     |     |             |
| Seed protein content               |        |        |           |          |         |      | 1        |             |        | 1      |           | 1         | 1      | 1     | 1        |     |              | 1         |        |      |         | 1       |            |            |             |       | 7     |     |             |
| Seed yield                         |        |        |           |          |         |      | 1        |             |        | 1      | 1         | 1         | 1      |       | 1        |     |              | 1         |        |      |         |         | 1          |            |             |       | 7     |     |             |
| Stem Color                         |        |        |           |          | 1       | 1    |          |             | 1      | 1      |           |           |        | 1     |          |     |              | 1         |        |      |         |         |            |            |             |       | 6     |     |             |
| stem diameter                      |        |        |           |          |         |      |          |             | 1      | 1      | 1         |           |        | 1     | 1        |     | 1            |           |        |      |         |         |            |            |             | 1     | 7     |     |             |
| Cold tolerance                     | 1      |        |           |          |         |      | 1        |             |        |        |           | 1         | 1      | 1     | 1        |     |              |           |        |      | 1       |         |            |            |             |       | 6     |     |             |
| Emergence time                     | 1      |        |           |          |         | 1    |          |             |        |        |           | 1         |        |       | 1        |     |              | 1         |        |      |         |         |            |            |             |       | 6     |     |             |
| Flower color                       |        |        |           |          |         |      | 1        |             |        | 1      |           |           |        |       | 1        |     |              | 1         |        |      |         |         | 1          |            | 1           |       | 6     |     |             |
| Grain yield                        |        |        |           |          |         |      | 1        |             |        | 1      |           |           |        | 1     |          | 1   |              |           |        |      | 1       | 1       | 1          |            |             |       | 6     |     |             |
| Leaf color                         |        |        |           |          | 1       |      |          |             |        | 1      |           |           | 1      | 1     | 1        |     |              |           |        |      | 1       | 1       |            |            |             | 1     | 6     |     |             |
| leaf length                        |        |        | 1         |          |         | 1    |          |             |        |        |           | 1         |        | 1     |          |     |              |           |        |      | 1       |         |            |            |             |       | 6     |     |             |
| Leaf shape                         |        |        |           |          |         | 1    |          |             |        | 1      |           | 1         |        | 1     |          |     |              | 1         | 1      |      | 1       |         |            |            |             | 1     | 6     |     |             |
| Lodging incidence                  |        |        |           |          |         |      |          |             |        | 1      | 1         |           | 1      | 1     | 1        | 1   |              | 1         | 1      |      |         |         |            |            |             | 1     | 6     |     |             |
| Peduncle length                    |        | 1      |           |          |         |      |          |             |        | 1      |           | 1         |        |       | 1        |     |              | 1         |        | 1    | 1       |         | 1          |            |             | 1     | 6     |     |             |
| Pod length                         |        |        |           |          |         |      | 1        | 1           |        |        | 1         |           | 1      |       |          |     |              | 1         |        | 1    |         |         | 1          |            |             |       | 6     |     |             |
| Root length                        |        |        | 1         |          | 1       |      | 1        |             |        |        |           | 1         | 1      |       |          |     |              |           |        | 1    |         |         |            |            |             |       | 6     |     |             |
| Canopy height                      |        |        |           |          |         |      | 1        |             |        | 1      |           |           | 1      | 1     |          |     |              |           |        | 1    |         |         | 1          |            |             |       | 5     |     |             |
| Grain weight                       |        |        |           |          |         |      |          |             |        |        |           |           |        | 1     |          |     | 1            |           |        | 1    | 1       |         |            |            |             | 1     | 5     |     |             |
| leaf width                         |        |        | 1         |          |         |      |          |             |        |        |           |           |        | 1     |          |     |              |           |        | 1    |         |         |            |            |             | 1     | 5     |     |             |
| Petiole length                     |        |        |           |          | 1       | 1    |          |             |        |        |           |           |        |       | 1        |     |              |           |        |      |         |         |            |            | 1           | 1     | 5     |     |             |
| Plant vigor                        |        | 1      |           |          |         |      |          |             |        | 1      |           | 1         |        |       | 1        |     |              | 1         |        |      |         |         |            |            | 1           | 1     | 5     |     |             |
| Seed color                         |        |        |           |          | 1       | 1    | 1        |             |        | 1      | 1         | 1         |        |       | 1        |     | 1            | 1         |        |      |         |         |            |            |             | 1     | 5     |     |             |
| Seed length                        |        |        |           |          |         | 1    |          |             |        | 1      | 1         |           | 1      |       | 1        |     |              |           |        |      |         |         |            |            |             |       | 5     |     |             |
| Seed width                         |        |        |           |          |         | 1    |          | 1           |        | 1      | 1         |           |        |       | 1        |     |              |           |        |      |         |         |            |            |             |       | 5     |     |             |
| Chlorophyll content                |        |        | 1         |          |         | 1    |          |             |        | 1      | 1         |           |        | 1     | 1        |     |              |           |        |      | 1       |         |            |            |             |       |       | 4   |             |
| Cooking time                       |        |        |           |          |         |      | 1        | 1           |        | 1      |           |           |        | 1     |          |     |              |           |        |      |         |         |            |            |             |       |       | 4   |             |
| Grain color                        |        |        |           |          |         |      |          |             |        |        |           |           |        | 1     | 1        |     | 1            |           |        |      |         |         |            |            |             |       |       | 4   |             |
| Heat tolerance                     |        |        |           |          |         |      |          |             |        |        |           |           | 1      | 1     | 1        |     |              |           |        | 1    |         |         |            |            |             | 1     | 4     |     |             |
| leaf area                          | 1      |        |           |          |         | 1    |          |             |        |        |           | 1         |        |       | 1        |     |              |           |        |      |         |         |            |            |             | 1     | 4     |     |             |
| Plant vigor                        |        |        |           |          |         |      |          |             |        |        |           | 1         |        | 1     |          |     |              |           |        | 1    |         | 1       |            |            |             |       | 4     |     |             |
| Pod number                         |        |        |           | 1        |         |      | 1        |             |        |        |           |           |        | 1     | 1        |     |              |           |        | 1    |         |         | 1          |            |             |       | 4     |     |             |
| Seed oil content                   |        |        |           |          |         | 1    |          |             | 1      |        |           | 1         |        | 1     |          |     |              | 1         |        |      |         |         |            |            |             |       | 4     |     |             |
| Stomatal conductance               |        |        |           |          |         |      |          | 1           |        | 1      |           |           | 1      | 1     |          |     |              |           |        | 1    |         |         | 1          |            |             |       | 4     |     |             |
| Amylose Content                    |        |        |           |          | 1       |      |          |             |        |        |           |           |        |       |          |     |              |           |        | 1    |         |         |            |            |             |       | 4     |     |             |
| Aphid damage                       |        |        |           |          |         |      |          |             |        | 1      | 1         |           |        | 1     |          |     |              |           |        | 1    |         |         |            |            | 1           |       | 3     |     |             |
| Aphid resistance                   |        |        |           |          |         |      |          |             |        | 1      |           |           |        | 1     | 1        |     |              |           |        |      |         |         |            |            |             | 1     | 3     |     |             |
| awn length                         |        | 1      |           |          |         |      |          |             |        |        |           |           | 1      |       |          |     |              |           |        |      |         |         |            |            |             |       | 3     |     |             |
| Biomass yield                      |        |        |           | 1        |         |      | 1        |             |        |        |           |           |        |       |          |     |              |           |        | 1    |         |         |            |            |             | 1     | 3     |     |             |
| Canopy temperature                 |        |        |           |          |         |      |          |             |        |        |           |           |        | 1     |          |     |              |           |        |      |         |         |            |            |             |       | 3     |     |             |
| Days to 50% flowering              |        |        |           |          |         |      | 1        | 1           |        | 1      |           |           |        | 1     |          |     |              |           |        |      |         |         |            |            |             | 1     | 3     |     |             |
| Flag leaf length                   |        | 1      |           |          |         |      |          |             |        | 1      |           |           |        |       |          |     | 1            |           |        | 1    |         |         |            |            |             |       | 3     |     |             |
| Fusarium wilt resistance           |        |        |           |          |         |      |          |             | 1      |        | 1         |           |        | 1     |          |     |              |           |        |      |         |         |            |            |             |       | 3     |     |             |
| Grain Iron content                 |        | 1      |           |          |         |      |          |             |        |        |           |           |        | 1     |          |     |              |           |        |      |         |         |            |            |             | 1     | 3     |     |             |
| grain length                       |        |        |           |          |         |      |          |             |        |        |           |           |        | 1     |          |     |              |           |        | 1    |         |         |            |            |             | 1     | 3     |     |             |
| Grain moisture content             |        | 1      |           |          |         |      |          |             |        |        |           |           |        |       |          |     |              |           |        | 1    |         |         |            |            |             |       | 3     |     |             |
| Grain number                       |        | 1      |           |          |         |      |          |             |        |        |           |           |        |       | 1        |     |              |           |        |      |         |         |            |            |             |       | 3     |     |             |
| Grain test weight                  |        | 1      |           |          |         |      |          |             |        |        |           |           |        |       | 1        |     |              |           |        |      |         |         |            |            |             |       | 3     |     |             |
| grain thickness                    |        |        |           |          |         |      |          |             |        |        |           |           |        | 1     |          |     |              |           |        |      |         |         |            |            |             |       | 3     |     |             |
| grain width                        |        |        |           |          |         |      |          |             |        |        |           |           |        | 1     |          |     |              |           |        | 1    |         |         |            |            |             |       | 3     |     |             |
| Grain Zinc content                 |        | 1      |           |          |         |      |          |             |        |        |           |           |        |       | 1        |     |              |           |        | 1    |         |         |            |            |             |       | 3     |     |             |
| Heading time                       |        | 1      |           |          |         |      |          |             |        |        |           |           |        |       |          |     |              |           |        |      |         | 1       |            |            |             |       | 3     |     |             |
| Internode length                   |        |        |           |          |         |      |          |             |        |        | 1         |           |        |       |          | 1   |              |           |        |      |         |         |            |            |             |       | 3     |     |             |
| Leaf carbon isotope discrimination |        |        |           |          |         |      |          | 1           |        |        |           | 1         |        |       |          |     |              |           |        |      |         |         |            |            |             | 1     | 3     |     |             |
| Leaf dry weight                    |        |        |           |          |         |      | 1        |             |        |        |           |           |        |       |          |     |              |           |        |      |         |         |            |            |             |       | 3     |     |             |
| Leaf number                        |        | 1      |           |          |         | 1    |          |             |        |        |           |           |        |       |          |     |              |           |        |      |         |         |            |            |             |       | 3     |     |             |
| Leaf weight                        |        |        |           |          | 1       |      |          |             |        | 1      |           | 1         |        |       |          |     |              |           |        |      |         |         | 1          |            |             |       | 3     |     |             |
| maturity                           |        |        |           |          |         |      |          |             |        |        | 1         |           |        |       |          |     |              |           |        | 1    |         |         |            | 1          |             |       | 3     |     |             |
| Nodulation                         |        |        |           |          |         |      |          |             |        |        | 1         |           |        |       | 1        |     |              |           |        | 1    |         |         | 1          |            |             | 1     | 3     |     |             |
| panicle length                     |        |        |           |          |         |      |          |             |        |        |           |           |        |       |          |     | 1            |           |        | 1    | 1       |         |            |            |             |       | 3     |     |             |
| Plant growth habit                 |        |        | 1         |          |         |      |          |             |        |        |           |           |        |       |          |     |              |           |        | 1    |         |         |            |            |             |       | 3     |     |             |
| Plant lodging incidence            |        | 1      |           | 1        |         |      |          |             |        |        |           |           |        | 1     |          |     |              |           |        |      |         | 1       |            |            |             |       | 3     |     |             |
| Pod borer resistance               |        |        |           |          |         |      | 1        |             |        |        |           |           | 1      |       | 1        |     |              |           |        |      |         |         |            |            |             |       | 3     |     |             |
| Pod curvature                      |        |        |           |          |         |      |          | 1           |        | 1      |           |           |        |       | 1        |     |              |           |        |      |         |         |            |            |             |       | 3     |     |             |
| Pod shattering                     |        |        |           |          |         | 1    |          |             |        |        | 1         |           |        |       |          |     |              |           |        |      |         |         | 1          |            |             |       | 3     |     |             |
| Pods per plant                     |        |        |           |          |         |      | 1        | 1           |        |        |           |           |        |       |          |     |              |           |        |      |         |         |            |            |             |       | 3     |     |             |
| Protein Content                    |        |        |           |          |         | 1    |          |             |        |        |           |           |        |       |          |     |              |           |        |      |         |         |            |            |             |       | 3     |     |             |
| Root length density                |        |        | 1         |          |         |      | 1        |             |        |        |           |           | 1      |       |          |     |              |           |        |      |         |         |            |            | 1           | 1     | 3     |     |             |
| Seed Calcium content               |        |        |           | 1        |         |      |          |             |        |        | 1         |           |        |       |          |     |              |           |        |      |         |         |            |            |             |       | 3     |     |             |
| Seed Copper content                |        |        |           |          |         |      |          |             |        |        | 1         |           |        |       | 1        |     |              |           |        |      |         |         |            |            |             |       | 3     |     |             |
| Seed Iron content                  |        |        |           |          |         |      |          |             |        |        | 1         |           |        |       | 1        |     |              |           |        |      |         |         |            |            |             |       | 3     |     |             |
| Seed Magnesium content             |        |        |           |          |         |      |          |             |        |        | 1         |           |        |       | 1        |     |              |           |        |      |         |         |            |            |             |       | 3     |     |             |
| Seed Manganese content             |        |        |           |          |         |      |          |             |        |        | 1         |           |        |       | 1        |     |              |           |        |      |         |         |            |            |             |       | 3     |     |             |
| Seed Potassium content             |        |        |           |          |         |      |          |             |        |        | 1         |           |        |       | 1        |     |              |           |        |      |         |         |            |            |             |       | 3     |     |             |
| Seed Selenium content              |        |        |           |          |         |      |          |             |        |        | 1         |           |        |       | 1        |     |              |           |        |      |         |         |            |            |             |       | 3     |     |             |
| Seed Sodium content                |        |        |           |          |         |      |          |             |        |        | 1         |           |        |       | 1        |     |              |           |        |      |         |         |            |            |             |       | 3     |     |             |
| Seed Zinc content                  |        |        |           |          |         | 1    |          |             |        |        | 1         |           |        |       | 1        |     |              |           |        |      |         |         |            |            |             |       | 3     |     |             |
| Seedling vigor                     |        |        |           |          |         |      |          |             |        |        |           |           |        | 1     |          |     |              |           |        |      |         | 1       |            |            |             |       | 3     |     |             |
| Seedling Vigour                    |        |        |           |          |         |      |          |             |        |        | 1         |           |        |       | 1        |     |              |           |        |      |         |         |            |            |             |       | 3     |     |             |
| Seeds per pod                      |        |        |           |          |         |      | 1        | 1           |        |        |           |           |        |       |          |     |              |           | 1      |      |         |         |            |            |             |       | 3     |     |             |
| Specific leaf area                 |        |        |           |          |         |      | 1        |             |        |        |           |           | 1      |       |          |     |              |           |        |      |         |         |            |            |             |       | 3     |     |             |
| stem bore damage                   |        |        |           |          |         |      |          |             |        |        |           | 1         |        | 1     |          |     |              |           |        |      | 1       |         |            |            |             | 1     | 3     |     |             |
| Stem pigmentation                  |        |        |           |          |         |      |          |             |        |        |           |           |        |       |          |     |              |           |        |      |         |         |            |            |             |       |       |     |             |



[illegible]

[illegible]

[illegible]



[illegible]









[illegible]

[illegible]



[illegible]







[illegible]



[illegible]

[illegible]



[illegible]
