# Supplementary material for: Challenges for FAIR-compliant description and comparison of crop phenotype data with standardized controlled vocabularies
Source: Oxford University Press journal article supplement (doi:10.1093/database/baab028), 2021-01-01
Supplement: baab028_supp.zip [file baab028_supp.zip]

|             | Banan | Barley | Brachi | Brassic | Cassav | Castor | Chickp | Commr | Cottor | Cowpr | Faba br | Groun | Lentil | Maize | Mungb | Oat  | Pearl r | Pigeor | Potatc | Rice | Sorghu | Soybe | Sugar | Sugar I | Sweet | Vitis | Whea | Yam  |
|-------------|-------|--------|--------|---------|--------|--------|--------|-------|--------|-------|---------|-------|--------|-------|-------|------|---------|--------|--------|------|--------|-------|-------|---------|-------|-------|------|------|
| Banana      |       | 0.25   | 0.29   | 0.00    | 0.22   | 1.74   | 1.11   | 0.29  | 0.24   | 0.22  | 0.28    | 0.56  | 0.29   | 0.28  | 0.28  | 0.32 | 0.62    | 0.30   | 0.00   | 0.37 | 0.20   | 0.56  | 0.00  | 0.00    | 0.43  | 0.21  | 0.16 | 0.00 |
| Barley      | 0.25  |        | 1.02   | 0.90    | 0.33   | 3.02   | 3.27   | 1.28  | 1.08   | 2.62  | 3.81    | 2.88  | 3.59   | 3.03  | 4.83  | 1.78 | 1.12    | 2.09   | 0.41   | 2.27 | 3.42   | 1.89  | 0.00  | 0.00    | 0.34  | 0.00  | 6.06 | 0.00 |
| Brachiaria  | 0.29  | 1.02   |        | 0.00    | 0.82   | 2.92   | 2.63   | 1.02  | 0.92   | 0.82  | 0.68    | 1.37  | 3.76   | 1.87  | 2.07  | 0.93 | 0.85    | 0.78   | 0.55   | 1.19 | 0.50   | 2.00  | 0.00  | 0.00    | 0.00  | 0.00  | 1.25 | 0.89 |
| Brassica    | 0.00  | 0.90   | 0.00   |         | 0.00   | 0.61   | 2.25   | 0.36  | 0.00   | 0.37  | 6.32    | 1.74  | 0.63   | 0.34  | 7.60  | 0.00 | 0.00    | 1.29   | 0.00   | 0.00 | 0.44   | 1.70  | 0.00  | 0.00    | 0.00  | 0.00  | 0.47 | 0.00 |
| Cassava     | 0.22  | 0.33   | 0.82   | 0.00    |        | 1.62   | 1.15   | 0.28  | 1.22   | 0.57  | 0.39    | 1.95  | 0.82   | 0.79  | 0.78  | 0.46 | 0.88    | 0.84   | 0.34   | 0.90 | 1.29   | 0.38  | 0.00  | 0.91    | 2.10  | 0.26  | 0.39 | 1.19 |
| Castorbean  | 1.74  | 3.02   | 2.92   | 0.61    | 1.62   |        | 4.52   | 1.57  | 2.73   | 2.44  | 3.97    | 4.70  | 2.94   | 1.99  | 6.76  | 1.82 | 1.67    | 2.27   | 1.08   | 0.59 | 1.47   | 4.58  | 0.00  | 0.00    | 0.78  | 0.36  | 1.99 | 1.75 |
| Chickpea    | 1.11  | 3.27   | 2.63   | 2.25    | 1.15   | 4.52   |        | 4.09  | 3.40   | 3.45  | 4.22    | 7.32  | 13.91  | 0.70  | 8.59  | 0.80 | 1.48    | 8.16   | 1.00   | 2.27 | 0.46   | 5.95  | 0.00  | 0.00    | 1.11  | 0.00  | 1.91 | 0.41 |
| Common B    | 0.29  | 1.28   | 0.80   | 0.36    | 0.28   | 1.57   | 4.09   |       | 0.30   | 3.33  | 2.26    | 2.66  | 2.40   | 0.78  | 3.44  | 0.45 | 0.43    | 3.25   | 0.00   | 0.66 | 0.31   | 1.50  | 0.00  | 0.00    | 0.54  | 0.00  | 1.55 | 0.00 |
| Cotton      | 0.24  | 1.08   | 0.92   | 0.00    | 1.22   | 2.73   | 3.40   | 0.30  |        | 1.23  | 2.16    | 3.06  | 2.78   | 0.85  | 3.51  | 0.53 | 1.00    | 2.83   | 0.75   | 0.48 | 0.70   | 4.29  | 0.00  | 0.00    | 0.00  | 0.00  | 1.24 | 1.62 |
| Cowpea      | 0.22  | 2.62   | 0.82   | 0.37    | 0.57   | 2.44   | 3.45   | 3.33  | 1.23   |       | 3.11    | 3.59  | 2.89   | 1.86  | 6.30  | 1.39 | 0.88    | 2.84   | 0.00   | 1.35 | 1.94   | 2.70  | 0.00  | 0.00    | 0.55  | 0.00  | 1.77 | 1.17 |
| Faba bean   | 0.28  | 3.81   | 0.68   | 6.32    | 0.39   | 3.97   | 4.22   | 2.26  | 2.16   | 3.11  |         | 4.38  | 1.36   | 0.71  | 19.50 | 1.65 | 1.53    | 4.20   | 0.00   | 0.57 | 1.40   | 4.88  | 0.00  | 0.00    | 0.00  | 0.00  | 1.21 | 0.84 |
| Groundnut   | 0.56  | 2.88   | 1.37   | 1.74    | 1.95   | 4.70   | 7.32   | 2.66  | 3.06   | 3.53  | 4.38    |       | 3.45   | 0.71  | 5.73  | 0.00 | 0.78    | 5.67   | 0.52   | 1.15 | 2.35   | 4.32  | 0.00  | 0.00    | 0.38  | 0.35  | 1.46 | 0.84 |
| Lentil      | 0.29  | 3.59   | 3.76   | 0.63    | 0.82   | 2.94   | 13.91  | 2.40  | 2.78   | 2.89  | 1.36    | 3.45  |        | 1.50  | 6.94  | 2.83 | 0.86    | 2.34   | 1.10   | 1.50 | 2.01   | 2.01  | 0.00  | 0.00    | 0.40  | 0.00  | 2.01 | 0.45 |
| Maize       | 0.28  | 3.03   | 1.87   | 0.34    | 0.79   | 1.99   | 0.70   | 0.78  | 0.85   | 1.86  | 0.71    | 0.71  | 1.50   |       | 1.43  | 2.07 | 1.59    | 1.14   | 0.95   | 2.35 | 3.58   | 1.06  | 0.00  | 0.00    | 0.00  | 0.00  | 4.31 | 1.39 |
| Mungbean    | 0.28  | 4.83   | 2.07   | 7.60    | 0.78   | 6.76   | 8.59   | 3.44  | 3.51   | 6.30  | 19.50   | 5.73  | 6.94   | 1.43  |       | 1.69 | 1.56    | 7.14   | 1.04   | 1.16 | 1.89   | 6.83  | 0.00  | 0.00    | 0.38  | 0.00  | 3.41 | 1.69 |
| Oat         | 0.32  | 1.78   | 0.93   | 0.00    | 0.46   | 1.82   | 0.80   | 0.45  | 0.53   | 1.39  | 1.65    | 0.00  | 2.83   | 2.07  | 1.69  |      | 1.11    | 0.98   | 0.00   | 0.97 | 2.30   | 0.81  | 0.00  | 0.00    | 0.00  | 0.00  | 2.68 | 0.00 |
| Pearl mille | 0.62  | 1.12   | 0.85   | 0.00    | 0.88   | 1.67   | 1.48   | 0.43  | 1.00   | 0.88  | 1.53    | 0.78  | 0.86   | 1.59  | 1.56  | 1.11 |         | 0.89   | 0.61   | 1.57 | 3.80   | 0.75  | 0.00  | 0.00    | 0.00  | 0.00  | 0.78 | 0.48 |
| Pigeonpea   | 0.30  | 2.09   | 0.78   | 1.29    | 0.84   | 2.27   | 8.16   | 3.25  | 2.83   | 2.84  | 4.20    | 5.67  | 2.34   | 1.14  | 7.14  | 0.98 | 0.89    |        | 0.56   | 0.91 | 0.51   | 6.90  | 0.00  | 0.00    | 0.81  | 0.37  | 1.77 | 0.91 |
| Potato      | 0.00  | 0.41   | 0.55   | 0.00    | 0.34   | 1.08   | 1.00   | 0.00  | 0.75   | 0.00  | 0.00    | 0.52  | 1.10   | 0.95  | 1.04  | 0.00 | 0.61    | 0.56   |        | 0.00 | 0.40   | 0.00  | 0.00  | 0.00    | 0.00  | 0.00  | 0.67 | 2.93 |
| Rice        | 0.37  | 2.27   | 1.19   | 0.00    | 0.90   | 0.59   | 2.27   | 0.66  | 0.48   | 1.35  | 0.57    | 1.15  | 1.50   | 2.35  | 1.16  | 0.97 | 1.57    | 0.91   | 0.00   |      | 1.99   | 0.57  | 0.00  | 0.32    | 0.44  | 0.21  | 3.00 | 0.47 |
| Sorghum     | 0.20  | 3.42   | 0.50   | 0.44    | 1.29   | 1.47   | 0.46   | 0.31  | 0.70   | 1.94  | 1.40    | 2.35  | 1.00   | 3.58  | 1.89  | 2.30 | 3.80    | 0.51   | 0.40   | 1.99 |        | 1.38  | 0.00  | 0.00    | 0.00  | 0.00  | 3.00 | 0.68 |
| Soybean     | 0.56  | 1.89   | 2.00   | 1.70    | 0.38   | 4.58   | 5.95   | 1.50  | 4.29   | 2.70  | 4.88    | 4.32  | 2.01   | 1.06  | 6.83  | 0.81 | 0.75    | 6.90   | 0.00   | 0.57 | 1.38   |       | 0.92  | 0.00    | 0.74  | 0.00  | 1.20 | 0.00 |
| Sugar beet  | 0.00  | 0.00   | 0.00   | 0.00    | 0.00   | 0.00   | 0.00   | 0.00  | 0.00   | 0.00  | 0.00    | 0.00  | 0.00   | 0.00  | 0.00  | 0.00 | 0.00    | 0.00   | 0.00   | 0.00 | 0.00   | 0.92  |       | 0.00    | 0.00  | 0.00  | 0.00 | 0.00 |
| Sugar Kelp  | 0.00  | 0.00   | 0.00   | 0.00    | 0.91   | 0.00   | 0.00   | 0.00  | 0.00   | 0.00  | 0.00    | 0.00  | 0.00   | 0.00  | 0.00  | 0.00 | 0.00    | 0.00   | 0.00   | 0.32 | 0.00   | 0.00  | 0.00  |         | 0.44  | 0.44  | 0.00 | 0.00 |
| Sweetpota   | 0.43  | 0.34   | 0.00   | 0.36    | 2.20   | 0.78   | 1.11   | 0.54  | 0.00   | 0.55  | 0.00    | 0.38  | 0.40   | 0.00  | 0.38  | 0.00 | 0.00    | 0.81   | 0.00   | 0.44 | 0.00   | 0.74  | 0.00  | 0.44    |       | 0.00  | 0.19 | 0.58 |
| Vitis       | 0.21  | 0.00   | 0.00   | 0.00    | 0.26   | 0.36   | 0.00   | 0.00  | 0.00   | 0.00  | 0.00    | 0.35  | 0.00   | 0.00  | 0.00  | 0.00 | 0.00    | 0.37   | 0.00   | 0.21 | 0.00   | 0.00  | 0.00  | 0.44    | 0.00  |       | 0.00 | 0.27 |
| Wheat       | 0.16  | 6.06   | 1.25   | 0.47    | 0.39   | 1.99   | 1.91   | 1.55  | 1.24   | 1.77  | 1.21    | 1.46  | 2.01   | 4.31  | 3.41  | 2.68 | 0.78    | 1.77   | 0.67   | 3.00 | 3.00   | 1.20  | 0.00  | 0.00    | 0.19  | 0.00  |      | 0.81 |
| Yam         | 0.00  | 0.00   | 0.89   | 0.00    | 1.19   | 1.75   | 0.41   | 0.00  | 1.62   | 1.17  | 0.84    | 0.84  | 0.45   | 1.39  | 1.69  | 0.00 | 0.48    | 0.91   | 2.93   | 0.47 | 0.68   | 0.00  | 0.00  | 0.00    | 0.58  | 0.27  | 0.81 |      |
